# Supplementary material
Source: Springer Nature journal article supplement (https://www.springermedizin.de/resource/supplementary/12985_2014_2453_MOESM1_ESM.pdf/9606768)

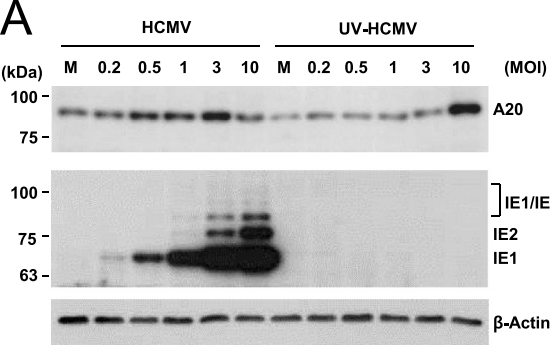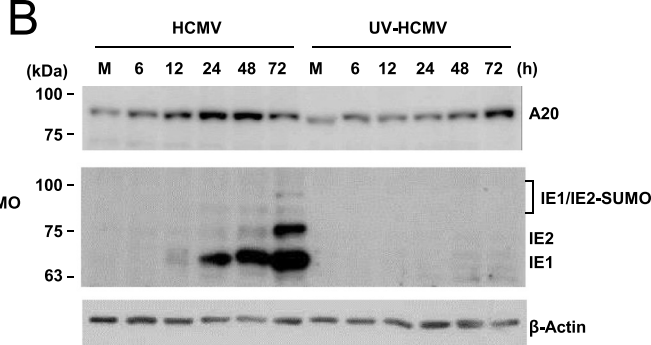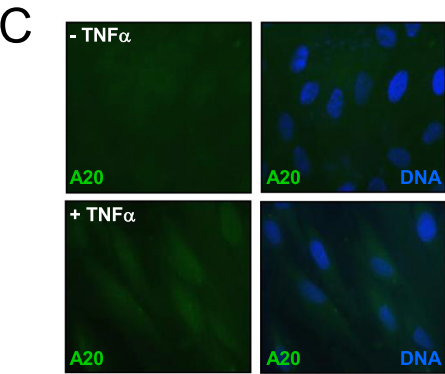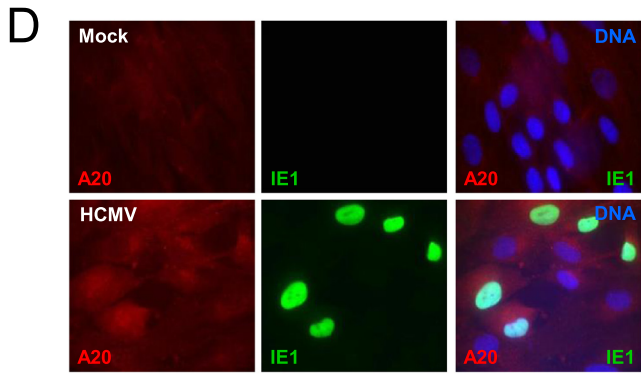

Supplement: MOESM1 [file 9606768]
